# Supplementary material
Source: PubMed Central journal article supplement (PMC1356329)

**Electron microscopy examination of the interactions between recombinant CNA and collagen fibrils.** A recombinant fragment of CNA was incubated with collagen fibrils isolated from neonate foreskin in an EM grid. Bound recombinant CNA proteins were detected by specific antibodies against CNA and secondary antibodies conjugated with gold.

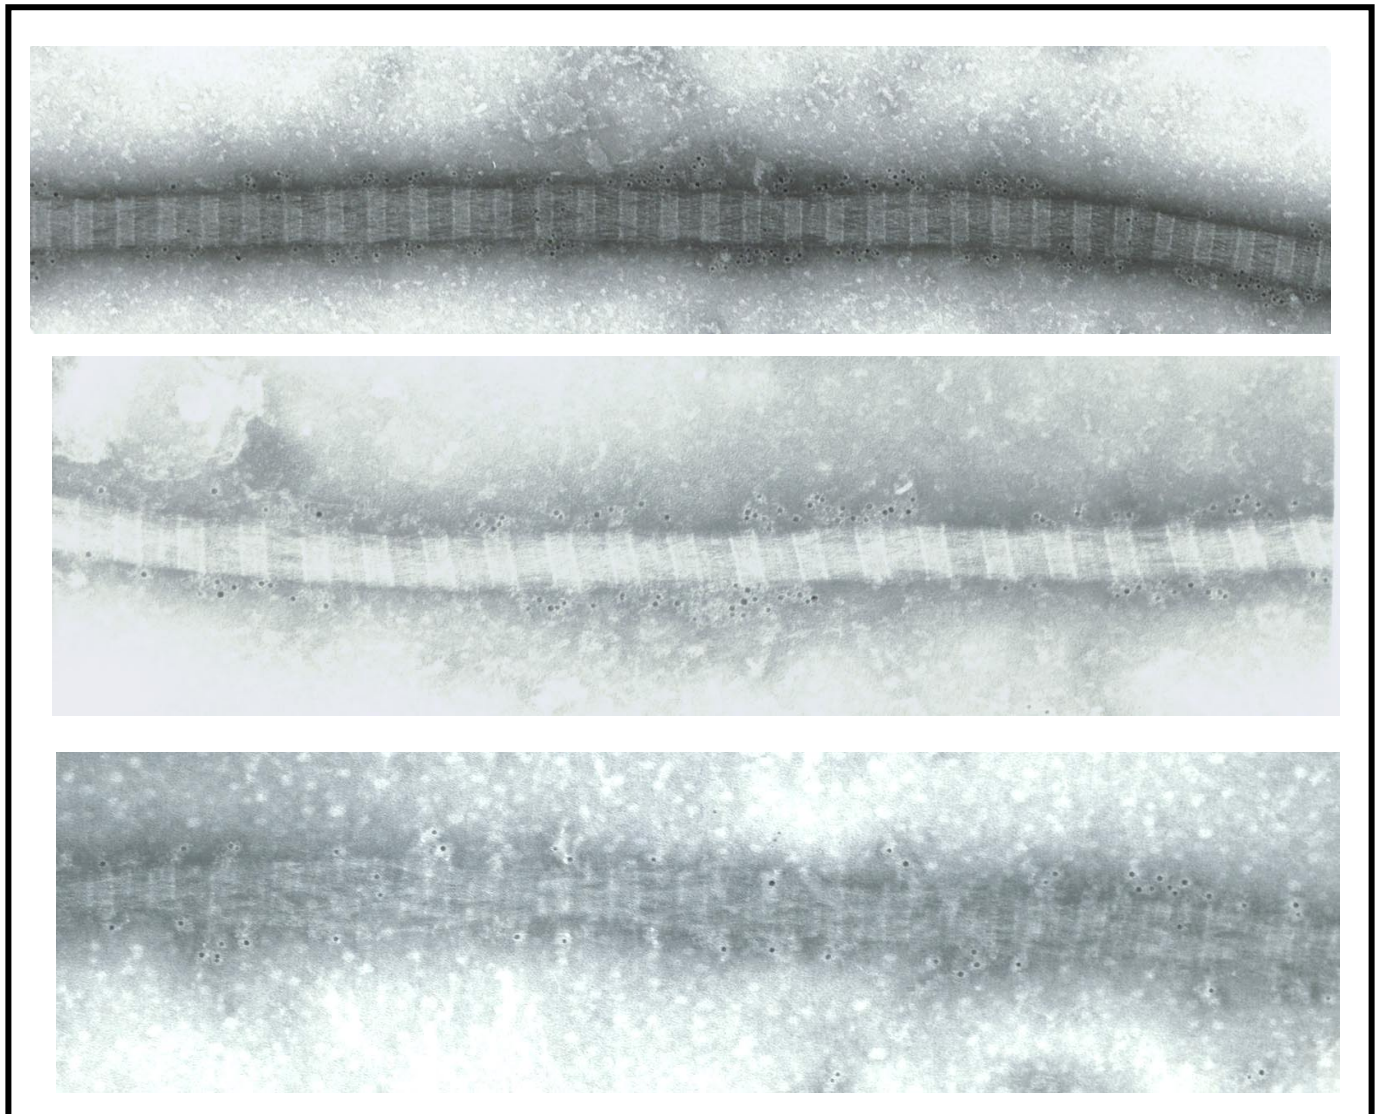

Supplement: 7600888s1.pdf [file 7600888s1.pdf]
