# Supplementary material
Source: PubMed Central journal article supplement (PMC1356329)

## Supplement Materials.

**Table 1. List of Oligonucleotides used for the generation of different CNA constructs**

| Name                  | Sequence (5' – 3')                |
|-----------------------|-----------------------------------|
| CNA <sub>31</sub> 5'  | GAAGGATCCGCACGAGATATTTTCATCAAC    |
| CNA <sub>531</sub> 3' | GTTGTCGACTTATGGTTTTTCAGTATTAGTAAC |
| CNA <sub>151</sub> 5' | GAAGGATCCATAACATCTGGGAATAAATC     |
| CNA <sub>141</sub> 5' | GAAGGATCCACAAATACTTCAGATGACAAAG   |
| CNA <sub>344</sub> 3' | GTTGTCGACTTAAGCCTTGGTATCTTTATCCTG |
| CNA <sub>318</sub> 3' | GTTGTCGACTCAATTGTGCACAGTATG       |
| CNA <sub>156</sub> 3' | GTTGTCGACTTATTTATTCCCAGATGTTAT    |
| CNA <sub>319</sub> 5' | CACGGATCCATTAATGCTAATGCCGGTATT    |

Supplement figure 1. Circular dichroism analysis of synthetic collagen peptides.

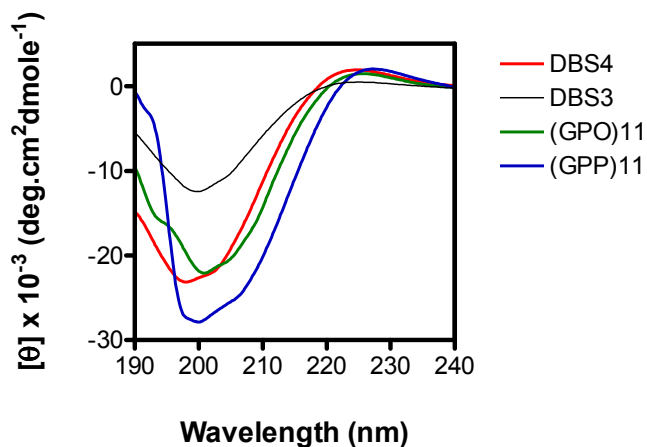

Supplement figure 2. CNA<sub>31-344</sub> dissolved from crystals has reduced a binding affinity for collagen. Biacore sensorgrams of different CNA samples at 0.1  $\mu\text{M}$  (panel A) and 1  $\mu\text{M}$  (panel B) over a type I collagen coated surface. Responses from a blank surface were subtracted.

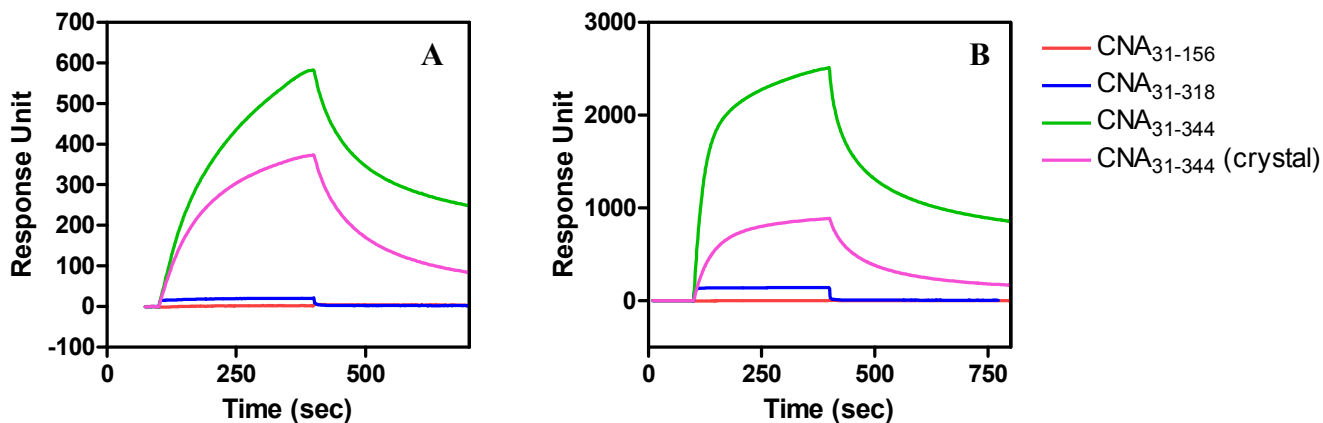

Supplement: 7600888s2.pdf [file 7600888s2.pdf]
